# Supplementary material for: Effective questionnaire-based prediction models for type 2 diabetes across several ethnicities: a model development and validation study
Source: PubMed Central journal article supplement (PMC10626169; doi:10.1016/j.eclinm.2023.102235), 2023-09-25
Supplement: mmc1.pdf [file mmc1.pdf]

## **Supplementary**

### **Table of Contents**

|                                                                       |    |
|-----------------------------------------------------------------------|----|
| <i>Basic analysis</i> .....                                           | 2  |
| <i>Questionnaire models</i> .....                                     | 5  |
| Diagnostic performance .....                                          | 5  |
| Feature selection and correlation.....                                | 6  |
| Model performance .....                                               | 7  |
| <i>Questionnaire &amp; Basic measurements models</i> .....            | 8  |
| Diagnostic performance .....                                          | 8  |
| Feature selection and correlation.....                                | 9  |
| Model performance .....                                               | 10 |
| Risk stratification .....                                             | 11 |
| <i>Questionnaire, Basic measurements, and Biomarkers models</i> ..... | 12 |
| Diagnostic performance .....                                          | 12 |
| Feature importance .....                                              | 13 |
| Model performance .....                                               | 14 |
| Risk stratification .....                                             | 15 |
| <i>Overall model comparison</i> .....                                 | 16 |
| <i>Reclassification Analysis</i> .....                                | 20 |

## **Basic analysis**

**Supplementary Table S1A.** UK Biobank type 2 diabetes annotation.

| Diagnosis  |                                        | Age of diagnosis |                                                                         |
|------------|----------------------------------------|------------------|-------------------------------------------------------------------------|
| Data-Field | Name                                   | Data-Field       | Name                                                                    |
| 20002      | Non-cancer illness code, self-reported | 20009            | Interpolated Age of participant when non-cancer illness first diagnosed |
| 2443       | Diabetes diagnosed by doctor           | 2976             | Age diabetes diagnosed                                                  |
| 41271      | Diagnoses – ICD9                       | 41281            | Date of first in-patient diagnosis - ICD9                               |
| 41270      | Diagnoses - ICD10                      | 41280            | Date of first in-patient diagnosis - ICD10                              |

**Supplementary Table S1B.** Lifelines type 2 diabetes annotation.

| Prevalent diagnosis        |                             | Incident diagnosis   |                                                                                                                                                                                                  |
|----------------------------|-----------------------------|----------------------|--------------------------------------------------------------------------------------------------------------------------------------------------------------------------------------------------|
| Variable                   | Age of diagnosis            | Variable             | Age of diagnosis                                                                                                                                                                                 |
| diabetes_type_adu_q_1 == 2 | diabetes_startage_adu_q_1   | t2d_followup_adu_q_1 | Manually calculated by MEAN (age at assessment when diagnosis reported, age previous assessment). If diabetes_followup_adu_q_1 was answered before, the age at this assessment was used instead. |
| diabetes_type_adu_q_2 == 2 | diabetes_presence_adu_q_2_a |                      |                                                                                                                                                                                                  |

**Supplementary Table S2.** Mapped features between the UK Biobank and Lifelines. For ordinal UK Biobank features, numeric data values were used. Subsequently, each category was one hot encoded; these feature names are depicted by “*category -- UK Biobank feature 0.0*”.

| UK Biobank feature                                                 | Lifelines feature     | Notes                                                                                                                                                                                        |
|--------------------------------------------------------------------|-----------------------|----------------------------------------------------------------------------------------------------------------------------------------------------------------------------------------------|
| <b>Questionnaire features</b>                                      |                       |                                                                                                                                                                                              |
| Age of attending assessment centre_0.0                             | median(AGE 1a)        | In the UK Biobank, more specific ages of attending the assessment centre were calculated based on the date of attending the assessment centre minus the birth year/month of the participant. |
| Alcohol intake frequency_0.0                                       | ffqh_alcohol_adu_q_27 | Alcohol intake categories did not match exactly between UK Biobank and Lifelines. The Lifelines categories were therefore mapped as closely as possible to the UK Biobank categories.        |
| Aspirin -- Medication for pain relief, constipation, heartburn_0.0 | otc_painfever_adu_q_1 |                                                                                                                                                                                              |
| Body mass index (BMI)_0.0                                          | bodyweight_kg_all_m_1 |                                                                                                                                                                                              |

*Effective questionnaire-based prediction models for type 2 diabetes across several ethnicities: a model*

*development and validation study*

|                                                                                                                                            |                                                                                              |                                                                                                                                                                                                                                                                      |
|--------------------------------------------------------------------------------------------------------------------------------------------|----------------------------------------------------------------------------------------------|----------------------------------------------------------------------------------------------------------------------------------------------------------------------------------------------------------------------------------------------------------------------|
| Bread intake_0.0                                                                                                                           | ffqh_breadproducts_adu_q_39                                                                  |                                                                                                                                                                                                                                                                      |
| CAD before first assessment. Annotated based on heart attack, PTCA, CABG, triple heart bypass, based on self report, OPCS4, ICD9 and ICD10 | heartattack_presence_adu_q_2,<br>heartattack_presence_adu_q_1,<br>angioplasty_bypass_adu_q_1 |                                                                                                                                                                                                                                                                      |
| Blood pressure medication -- MERGED 6153 6177_0.0                                                                                          | hypertension_treatment_adu_q_1 == 3 or 4                                                     | In the UK Biobank, blood pressure medication was annotated by merging data fields 6153 and 6177.                                                                                                                                                                     |
| Cholesterol lowering medication -- MERGED 6153 6177_0.0                                                                                    | highcholesterol_treatment_adu_q_1 == 3 or 4                                                  | In the UK Biobank, cholesterol lowering medication was annotated by merging data fields 6153 and 6177.                                                                                                                                                               |
| Pack years of smoking_0.0                                                                                                                  | packyears_cumulative_adu_c_2                                                                 | In the UK Biobank, NA's were replaced with 0.                                                                                                                                                                                                                        |
| Unable to work because of sickness or disability -- Current employment status_0.0                                                          | employment_stopped_adu_q_1_d == 2                                                            |                                                                                                                                                                                                                                                                      |
| Yes - lost weight -- Weight change compared with 1 year ago_0.0                                                                            | bodyweight_highest_adu_q_1_a -<br>bodyweight_kg_all_m_1 > 5                                  |                                                                                                                                                                                                                                                                      |
| Yes - gained weight -- Weight change compared with 1 year ago_0.0                                                                          | bodyweight_lowest_adu_q_1_a -<br>bodyweight_kg_all_m_1 > 5                                   |                                                                                                                                                                                                                                                                      |
| Number of treatments/medications taken MAX 12 excl insulin_0.0                                                                             | N atc_code_adu_c_01-32 -<br>(diabetes_treatment_adu_q_1 == 3 or 4)                           | In the UK Biobank, values above 12 for "Number of treatments/medications taken" were put on 12 to remove outliers. The number 12 was manually chosen as the cut-off based on a histogram of the values. Subsequently, for all insulin users, 1 point was subtracted. |
| Diabetes illness of father and/or mother_0.0                                                                                               | t2d_father_fam_q_1 AND/OR<br>t2d_mother_fam_q_1                                              | In the UK Biobank, consisting of Diabetes – Illness of father_0.0 AND/OR Diabetes – Illness of mother_0.0                                                                                                                                                            |
| Diabetes -- Illnesses of siblings_0.0                                                                                                      | t2d_sibling_fam_q_1                                                                          |                                                                                                                                                                                                                                                                      |
| <b>Basic measurements features</b>                                                                                                         |                                                                                              |                                                                                                                                                                                                                                                                      |
| Waist circumference_0.0                                                                                                                    | circumference_waist_all_m_1                                                                  |                                                                                                                                                                                                                                                                      |
| Pulse rate, automated reading MEAN_0.0                                                                                                     | bpavg_pulse_all_m_1                                                                          | In the UK Biobank, automated and manual reading were combined, and the mean of the two measured pulse rates was taken.                                                                                                                                               |
| Diastolic blood pressure MEAN_0.0                                                                                                          | bpavg_diastolic_all_m_1                                                                      | In the UK Biobank, automated and manual readings were combined, and the mean of all blood pressure measurements was taken.                                                                                                                                           |
| <b>Biomarker features</b>                                                                                                                  |                                                                                              |                                                                                                                                                                                                                                                                      |
| Glucose_0.0                                                                                                                                | glucose_result_all_m_1                                                                       |                                                                                                                                                                                                                                                                      |

*Effective questionnaire-based prediction models for type 2 diabetes across several ethnicities: a model  
development and validation study*

|                                  |                            |  |
|----------------------------------|----------------------------|--|
| Glycated haemoglobin (HbA1c)_0.0 | hba1cconc_result_all_m_1   |  |
| Cholesterol_0.0                  | cholesterol_result_all_m_1 |  |

**Supplementary Table S3.** Ethnic group formations in the UK Biobank.

| <b>Ethnic group</b> | <b>UK Biobank entries (Data-Field 21000: Ethnic background)</b>                          |
|---------------------|------------------------------------------------------------------------------------------|
| White               | White, British, Irish, Any other white background                                        |
| South Asian         | Indian, Pakistani, Bangladeshi                                                           |
| Caribbean           | Caribbean, White and Black Caribbean                                                     |
| East Asian          | Asian or Asian British, Chinese, White and Asian, Any other Asian background             |
| Black               | Black or Black British, African, White and Black African, Any other Black background     |
| Other               | Other ethnic group, Do not know, Prefer not to answer, Mixed, Any other mixed background |

**Supplementary Table S4.** Ethnic makeup of the Lifelines cohort as established at baseline.

| <b>Ethnicity</b>              | <b>Frequency</b> | <b>Percentage</b> |
|-------------------------------|------------------|-------------------|
| White/East and West European  | 121,199          | 98%               |
| White/Mediterranean or Arabic | 432              | 0.3%              |
| Black                         | 201              | 0.2%              |
| Asian                         | 613              | 0.5%              |
| Other, namely                 | 1,248            | 1%                |
| Total reported ethnicities    | 123,733          | 100%              |
| No ethnicity reported         | 44,512           | NA                |

## **Questionnaire models**

### **Diagnostic performance**

**Supplementary Table S5A.** Prevalent type 2 diabetes prediction optimised with Youden's method. High- and low-risk groups were created based on the same probability thresholds as presented in the last column; Positive Predictive Value (PPV), Negative Predictive Value (NPV).

| <b>Population</b>  | <b>N</b> | <b>Low-risk</b> | <b>High-risk</b> | <b>Sensitivity<br/>(95% CI)</b> | <b>Specificity<br/>(95% CI)</b> | <b>PPV<br/>(95% CI)</b> | <b>NPV<br/>(95% CI)</b> | <b>Threshold</b> |
|--------------------|----------|-----------------|------------------|---------------------------------|---------------------------------|-------------------------|-------------------------|------------------|
| <b>White</b>       | 317779   | 251595          | 66184            | 83 (83-84)                      | 83 (83-83)                      | 24 (24-24)              | 99 (99-99)              | 0·053            |
| <b>South Asian</b> | 5605     | 3688            | 1917             | 80 (78-82)                      | 80 (79-81)                      | 55 (53-57)              | 93 (92-94)              | 0·065            |
| <b>Caribbean</b>   | 2960     | 2216            | 744              | 80 (76-84)                      | 85 (84-86)                      | 50 (46-54)              | 96 (95-97)              | 0·068            |
| <b>East Asian</b>  | 2907     | 2270            | 637              | 75 (70-79)                      | 86 (85-87)                      | 44 (41-48)              | 96 (95-97)              | 0·065            |
| <b>Black</b>       | 2151     | 1573            | 578              | 75 (71-80)                      | 82 (80-84)                      | 45 (41-49)              | 95 (93-96)              | 0·061            |
| <b>Other</b>       | 4621     | 3540            | 1081             | 80 (77-83)                      | 84 (83-86)                      | 42 (39-45)              | 97 (96-97)              | 0·065            |
| <b>Lifelines</b>   | 91736    | 78380           | 13356            | 83 (81-84)                      | 87 (87-87)                      | 11 (10-11)              | 100 (100-100)           | 0·048            |

**Supplementary Table S5B.** Incident type 2 diabetes prediction optimised with Youden's method. High- and low-risk groups were created based on the same probability thresholds as presented in the last column; Positive Predictive Value (PPV), Negative Predictive Value (NPV).

| <b>Population</b>  | <b>N</b> | <b>Low-risk</b> | <b>High-risk</b> | <b>Sensitivity<br/>(95% CI)</b> | <b>Specificity<br/>(95% CI)</b> | <b>PPV<br/>(95% CI)</b> | <b>NPV<br/>(95% CI)</b> | <b>Threshold</b> |
|--------------------|----------|-----------------|------------------|---------------------------------|---------------------------------|-------------------------|-------------------------|------------------|
| <b>White</b>       | 179740   | 140404          | 39336            | 79 (78-80)                      | 80 (80-80)                      | 10 (10-10)              | 99 (99-99)              | 0·027            |
| <b>South Asian</b> | 2408     | 1568            | 840              | 81 (75-86)                      | 69 (67-71)                      | 19 (16-22)              | 98 (97-98)              | 0·014            |
| <b>Caribbean</b>   | 1559     | 1259            | 300              | 76 (65-84)                      | 84 (82-86)                      | 22 (17-27)              | 98 (97-99)              | 0·038            |
| <b>East Asian</b>  | 1019     | 756             | 263              | 80 (68-89)                      | 78 (75-80)                      | 19 (14-24)              | 98 (97-99)              | 0·013            |
| <b>Black</b>       | 3435     | 2288            | 1147             | 98 (89-100)                     | 68 (66-69)                      | 4 (3-5)                 | 100 (100-100)           | 0·012            |
| <b>Other</b>       | 3363     | 2635            | 728              | 79 (70-86)                      | 80 (79-82)                      | 12 (9-14)               | 99 (99-99)              | 0·027            |
| <b>Lifelines</b>   | 32686    | 23739           | 8947             | 75 (71-78)                      | 73 (73-74)                      | 5 (4-5)                 | 99 (99-99)              | 0·011            |

*Effective questionnaire-based prediction models for type 2 diabetes across several ethnicities: a model development and validation study*

**Feature selection and correlation**

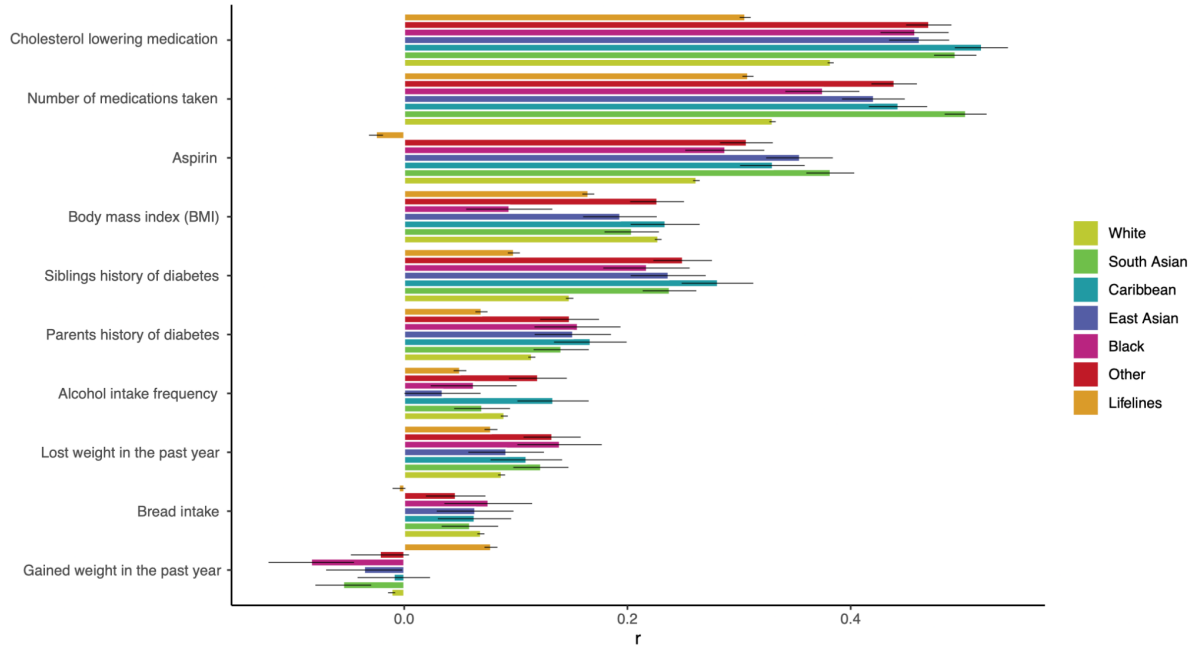

**Supplementary Figure S2A.** The correlation between each feature and prevalent type 2 diabetes for each population. Higher  $r$  values indicate positive correlations, while negative  $r$  values show negative correlations between both variables.

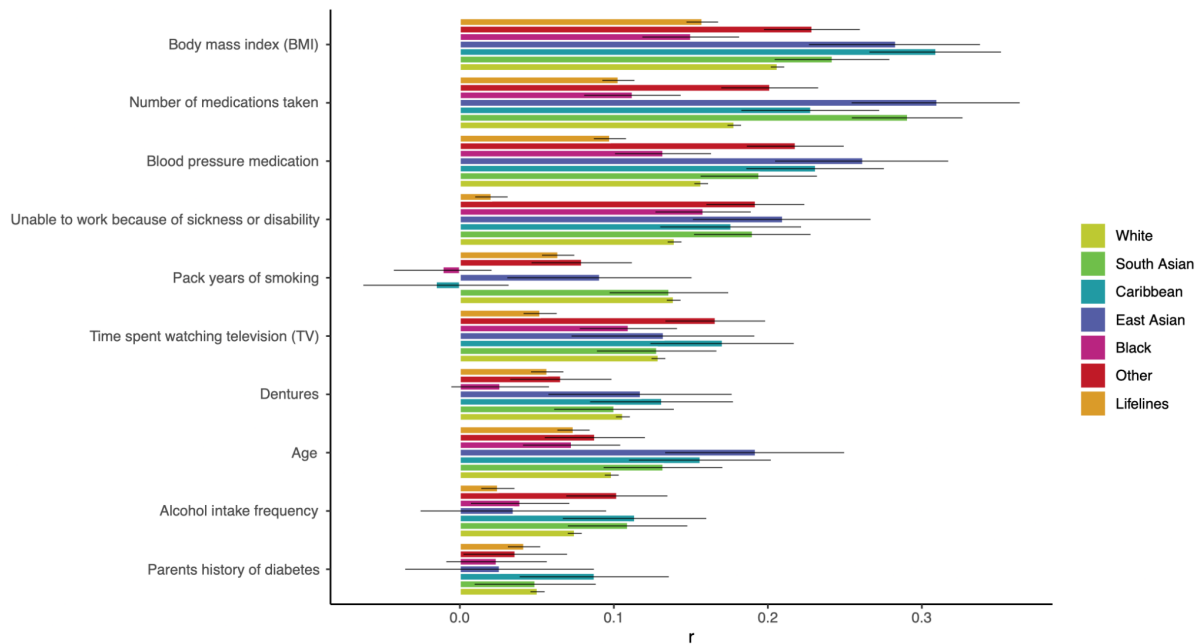

**Supplementary Figure S2B.** The correlation between each feature and incident type 2 diabetes for each population. Higher  $r$  values indicate positive correlations, while negative  $r$  values show negative correlations between both variables.

*Effective questionnaire-based prediction models for type 2 diabetes across several ethnicities: a model development and validation study*

**Model performance**

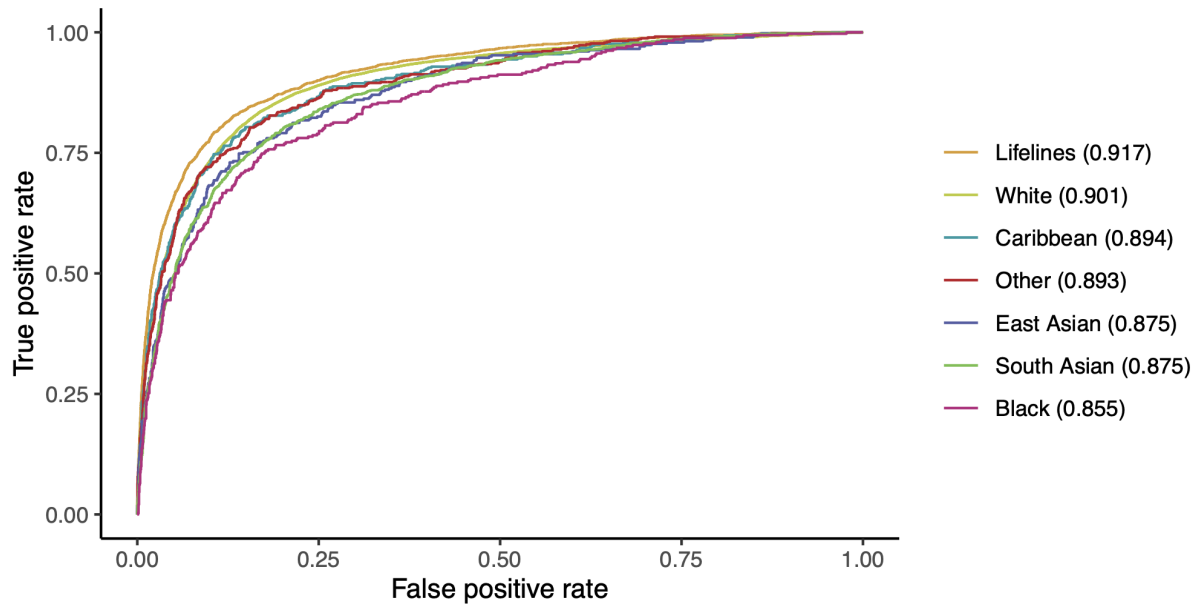

**Supplementary Figure S3A.** AUC scores for the questionnaire-based prevalence prediction models.

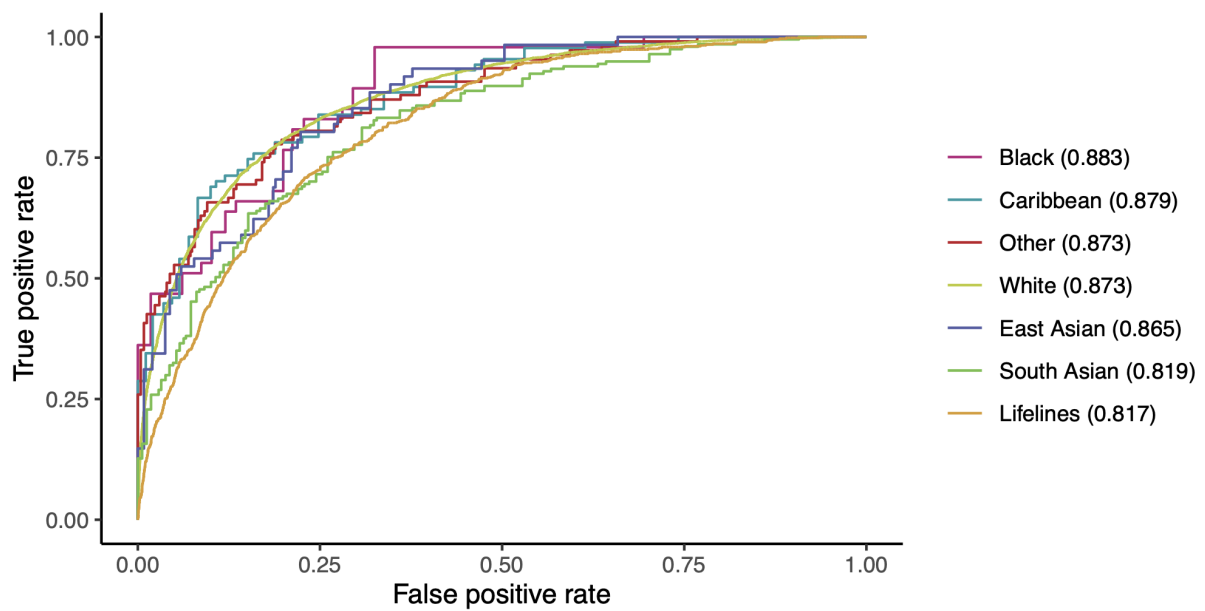

**Supplementary Figure S3B.** AUC scores for the questionnaire-based incidence prediction models.

## **Questionnaire & Basic measurements models**

### **Diagnostic performance**

**Supplementary Table S6A.** Prevalent type 2 diabetes prediction optimised with Youden's method. High- and low-risk groups were created based on the same probability thresholds as presented in the last column; Positive Predictive Value (PPV), Negative Predictive Value (NPV).

| <b>Population</b>  | <b>N</b> | <b>Low-risk</b> | <b>High-risk</b> | <b>Sensitivity<br/>(95% CI)</b> | <b>Specificity<br/>(95% CI)</b> | <b>PPV<br/>(95% CI)</b> | <b>NPV<br/>(95% CI)</b> | <b>Threshold</b> |
|--------------------|----------|-----------------|------------------|---------------------------------|---------------------------------|-------------------------|-------------------------|------------------|
| <b>White</b>       | 321178   | 258449          | 62729            | 83 (82-83)                      | 85 (84-85)                      | 26 (25-26)              | 99 (99-99)              | 0·059            |
| <b>South Asian</b> | 5792     | 3864            | 1928             | 81 (79-83)                      | 81 (80-82)                      | 57 (55-59)              | 93 (93-94)              | 0·082            |
| <b>Caribbean</b>   | 3061     | 2403            | 658              | 80 (76-83)                      | 90 (88-91)                      | 59 (56-63)              | 96 (95-97)              | 0·104            |
| <b>East Asian</b>  | 2971     | 2255            | 716              | 79 (74-82)                      | 84 (83-86)                      | 43 (39-47)              | 96 (95-97)              | 0·061            |
| <b>Black</b>       | 2252     | 1529            | 723              | 82 (78-86)                      | 77 (75-79)                      | 41 (37-44)              | 96 (95-97)              | 0·045            |
| <b>Other</b>       | 4777     | 3862            | 915              | 77 (73-80)                      | 89 (88-90)                      | 49 (46-52)              | 97 (96-97)              | 0·096            |
| <b>Lifelines</b>   | 93263    | 79599           | 13664            | 81 (80-83)                      | 87 (86-87)                      | 11 (11-12)              | 100 (100-100)           | 0·103            |

**Supplementary Table S6B.** Incident type 2 diabetes prediction optimised with Youden's method. High- and low-risk groups were created based on the same probability thresholds as presented in the last column; Positive Predictive Value (PPV), Negative Predictive Value (NPV).

| <b>Population</b>  | <b>N</b> | <b>Low-risk</b> | <b>High-risk</b> | <b>Sensitivity<br/>(95% CI)</b> | <b>Specificity<br/>(95% CI)</b> | <b>PPV<br/>(95% CI)</b> | <b>NPV<br/>(95% CI)</b> | <b>Threshold</b> |
|--------------------|----------|-----------------|------------------|---------------------------------|---------------------------------|-------------------------|-------------------------|------------------|
| <b>White</b>       | 183185   | 145425          | 37760            | 78 (77-79)                      | 81 (81-81)                      | 11 (11-11)              | 99 (99-99)              | 0·029            |
| <b>South Asian</b> | 2444     | 1573            | 871              | 80 (74-85)                      | 68 (66-70)                      | 19 (16-22)              | 97 (96-98)              | 0·015            |
| <b>Caribbean</b>   | 1670     | 1182            | 488              | 88 (79-94)                      | 74 (72-76)                      | 16 (13-20)              | 99 (98-100)             | 0·017            |
| <b>East Asian</b>  | 1034     | 752             | 282              | 85 (74-92)                      | 77 (74-79)                      | 20 (15-25)              | 99 (98-99)              | 0·010            |
| <b>Black</b>       | 3644     | 2586            | 1058             | 89 (77-96)                      | 72 (70-73)                      | 4 (3-5)                 | 100 (100-100)           | 0·019            |
| <b>Other</b>       | 3438     | 2513            | 925              | 82 (73-88)                      | 75 (73-76)                      | 10 (8-12)               | 99 (99-99)              | 0·022            |
| <b>Lifelines</b>   | 32686    | 20914           | 11772            | 86 (83-88)                      | 65 (64-65)                      | 4 (4-5)                 | 100 (100-100)           | 0·012            |



**Feature selection and correlation**

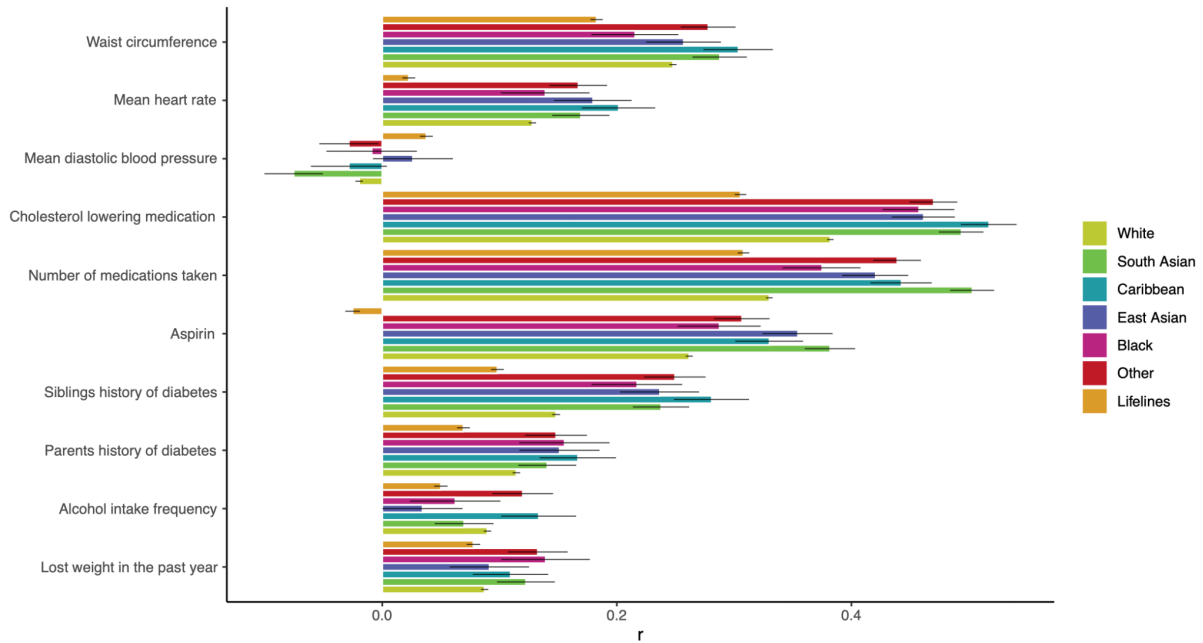

**Supplementary Figure S4A.** The correlation between each feature and prevalent type 2 diabetes for each population. Higher  $r$  values indicate positive correlations, while negative  $r$  values show negative correlations between both variables.

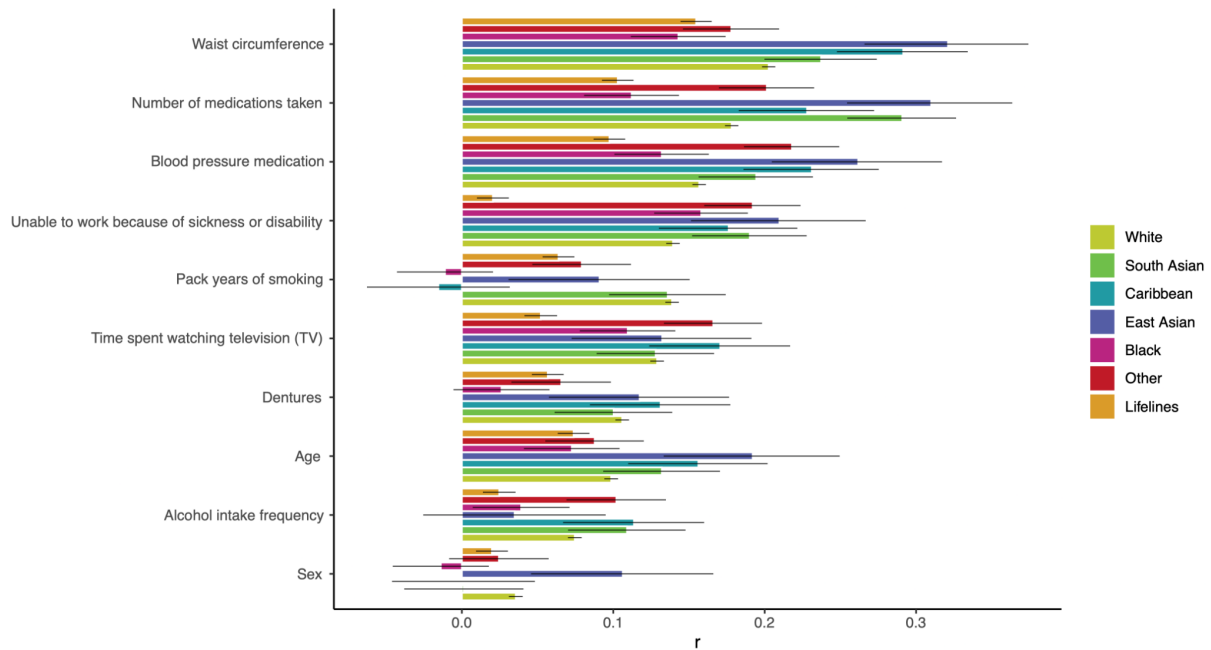

**Supplementary Figure S4B.** The correlation between each feature and incident type 2 diabetes for each population. Higher  $r$  values indicate positive correlations, while negative  $r$  values show negative correlations between both variables.

*Effective questionnaire-based prediction models for type 2 diabetes across several ethnicities: a model development and validation study*

**Model performance**

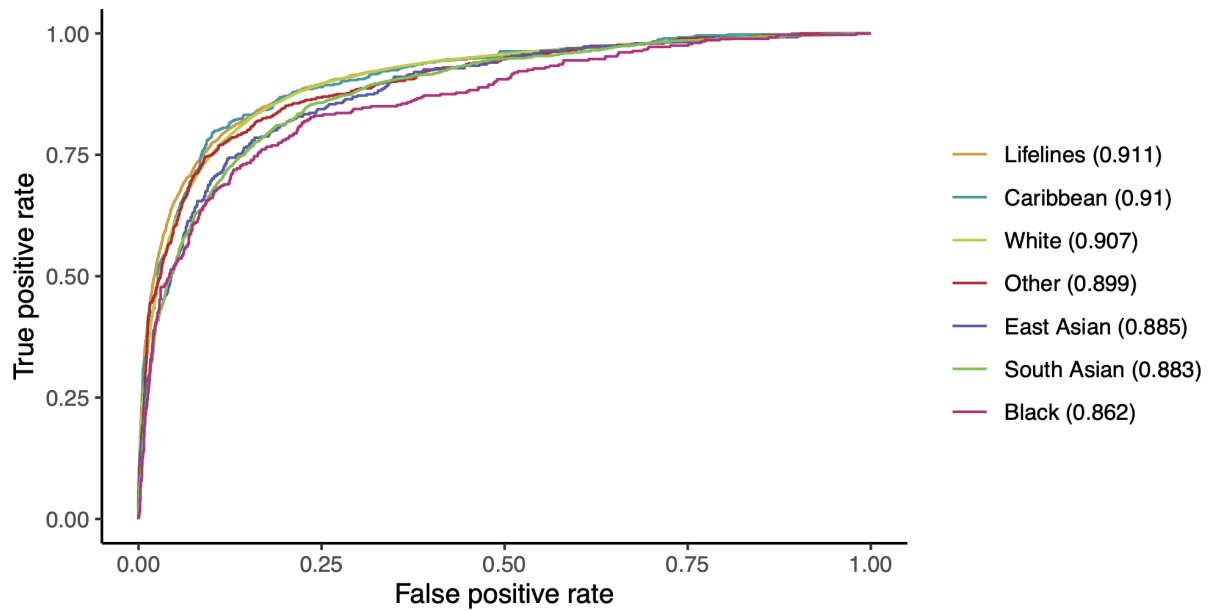

**Supplementary Figure S5A.** AUC scores for the questionnaire & basic measurements-based prevalence prediction models.

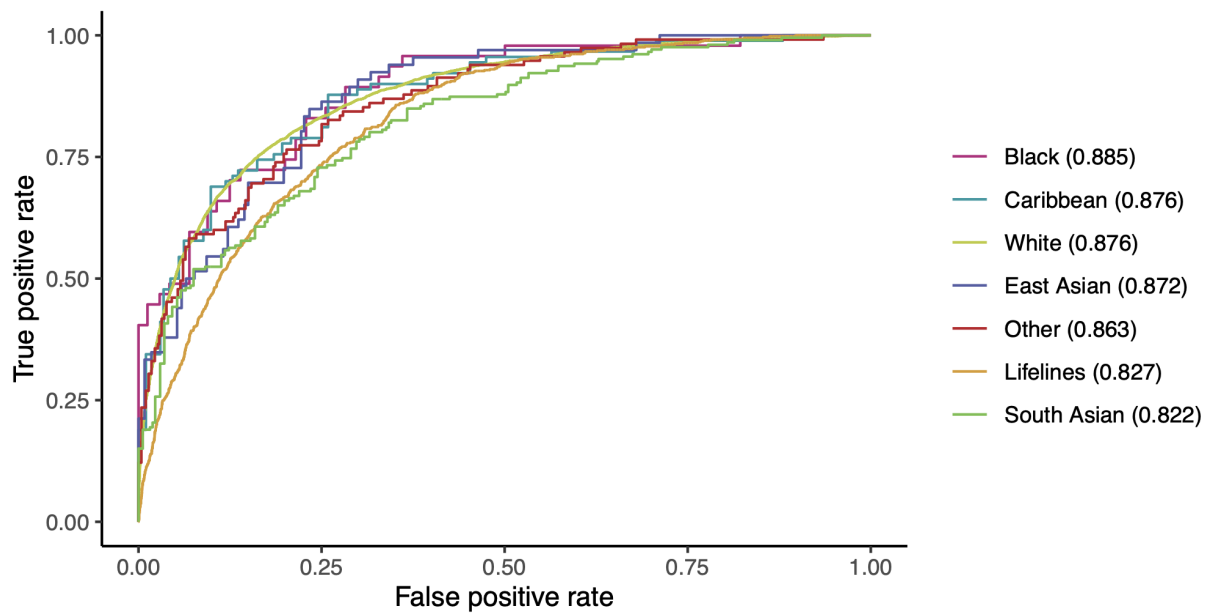

**Supplementary Figure S5B.** AUC scores for the questionnaire & basic measurements-based incidence prediction models.

**Risk stratification**

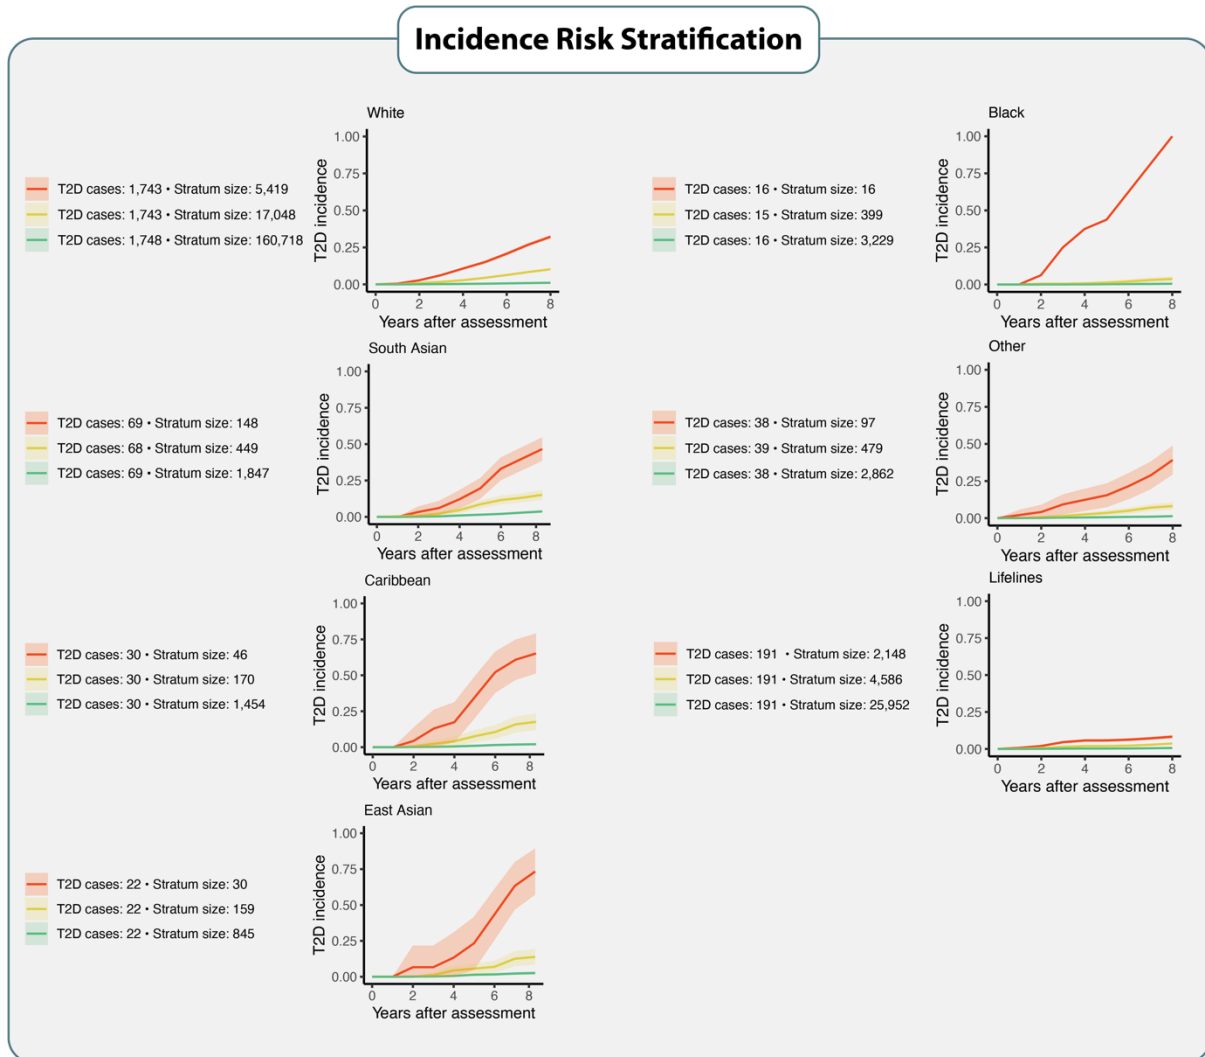

**Supplementary Figures S6.** Risk identification for developing T2D per ethnic group. Every ethnic group is separated into three risk strata, according to the individuals' risk of incident T2D (high risk = red, medium risk = yellow, low risk = green), with each risk stratum containing 33% of all T2D cases. The x-axis represents the interval of years between the biobank entry and the moment of receiving a diagnosis of T2D. The y-axis represents the incidence of T2D. The stronger-coloured lines represent the average T2D incidence within each risk stratum, and the lighter-coloured bands around the lines show the 95% CI. T2D cases correspond to the total number of T2D incident cases within each risk stratum. Stratum size corresponds to the number of individuals within each risk stratum. Stratum sizes show how many individuals must be screened to identify 33% of all T2D cases within each risk-stratum.

## **Questionnaire, Basic measurements, and Biomarkers models**

### **Diagnostic performance**

**Supplementary Table S7A.** Prevalent type 2 diabetes prediction optimised with Youden's method. High- and low-risk groups were created based on the same probability thresholds as presented in the last column; Positive Predictive Value (PPV), Negative Predictive Value (NPV).

| <b>Population</b>  | <b>N</b> | <b>Low-risk</b> | <b>High-risk</b> | <b>Sensitivity (95% CI)</b> | <b>Specificity (95% CI)</b> | <b>PPV (95% CI)</b> | <b>NPV (95% CI)</b> | <b>Threshold</b> |
|--------------------|----------|-----------------|------------------|-----------------------------|-----------------------------|---------------------|---------------------|------------------|
| <b>White</b>       | 318198   | 288426          | 29772            | 88 (88-89)                  | 95 (95-95)                  | 48 (47-48)          | 99 (99-99)          | 0.063            |
| <b>South Asian</b> | 5532     | 4310            | 1222             | 89 (87-91)                  | 94 (93-95)                  | 78 (75-80)          | 97 (97-98)          | 0.153            |
| <b>Caribbean</b>   | 2906     | 2521            | 385              | 84 (80-88)                  | 96 (95-97)                  | 72 (67-77)          | 98 (97-98)          | 0.252            |
| <b>East Asian</b>  | 2884     | 2458            | 426              | 88 (84-91)                  | 94 (93-95)                  | 62 (57-66)          | 99 (98-99)          | 0.103            |
| <b>Black</b>       | 2128     | 1758            | 370              | 85 (80-90)                  | 91 (89-92)                  | 52 (47-57)          | 98 (97-99)          | 0.111            |
| <b>Other</b>       | 4674     | 4068            | 606              | 88 (84-91)                  | 95 (94-96)                  | 66 (62-69)          | 99 (98-99)          | 0.129            |
| <b>Lifelines</b>   | 112745   | 105903          | 6842             | 93 (92-94)                  | 96 (96-96)                  | 30 (29-31)          | 100 (100-100)       | 0.114            |

**Supplementary Table S7B.** Incident type 2 diabetes prediction optimised with Youden's method. High- and low-risk groups were created based on the same probability thresholds as presented in the last column; Positive Predictive Value (PPV), Negative Predictive Value (NPV).

| <b>Population</b>  | <b>N</b> | <b>Low-risk</b> | <b>High-risk</b> | <b>Sensitivity (95% CI)</b> | <b>Specificity (95% CI)</b> | <b>PPV (95% CI)</b> | <b>NPV (95% CI)</b> | <b>Threshold</b> |
|--------------------|----------|-----------------|------------------|-----------------------------|-----------------------------|---------------------|---------------------|------------------|
| <b>White</b>       | 179538   | 149879          | 29659            | 84 (82-85)                  | 85 (85-86)                  | 14 (14-15)          | 99 (99-99)          | 0.028            |
| <b>South Asian</b> | 2353     | 1772            | 581              | 88 (83-93)                  | 81 (79-83)                  | 30 (27-34)          | 99 (98-99)          | 0.034            |
| <b>Caribbean</b>   | 1630     | 1341            | 289              | 91 (83-96)                  | 86 (85-88)                  | 27 (22-33)          | 99 (99-100)         | 0.057            |
| <b>East Asian</b>  | 991      | 836             | 155              | 86 (75-93)                  | 89 (87-91)                  | 36 (29-44)          | 99 (98-100)         | 0.028            |
| <b>Black</b>       | 3577     | 3050            | 527              | 76 (61-87)                  | 86 (85-87)                  | 7 (5-9)             | 100 (99-100)        | 0.086            |
| <b>Other</b>       | 3394     | 2912            | 482              | 89 (81-94)                  | 88 (87-89)                  | 21 (17-25)          | 100 (99-100)        | 0.034            |
| <b>Lifelines</b>   | 32218    | 26388           | 5830             | 82 (78-85)                  | 83 (83-83)                  | 8 (7-9)             | 100 (100-100)       | 0.053            |

*Effective questionnaire-based prediction models for type 2 diabetes across several ethnicities: a model development and validation study*

**Feature importance**

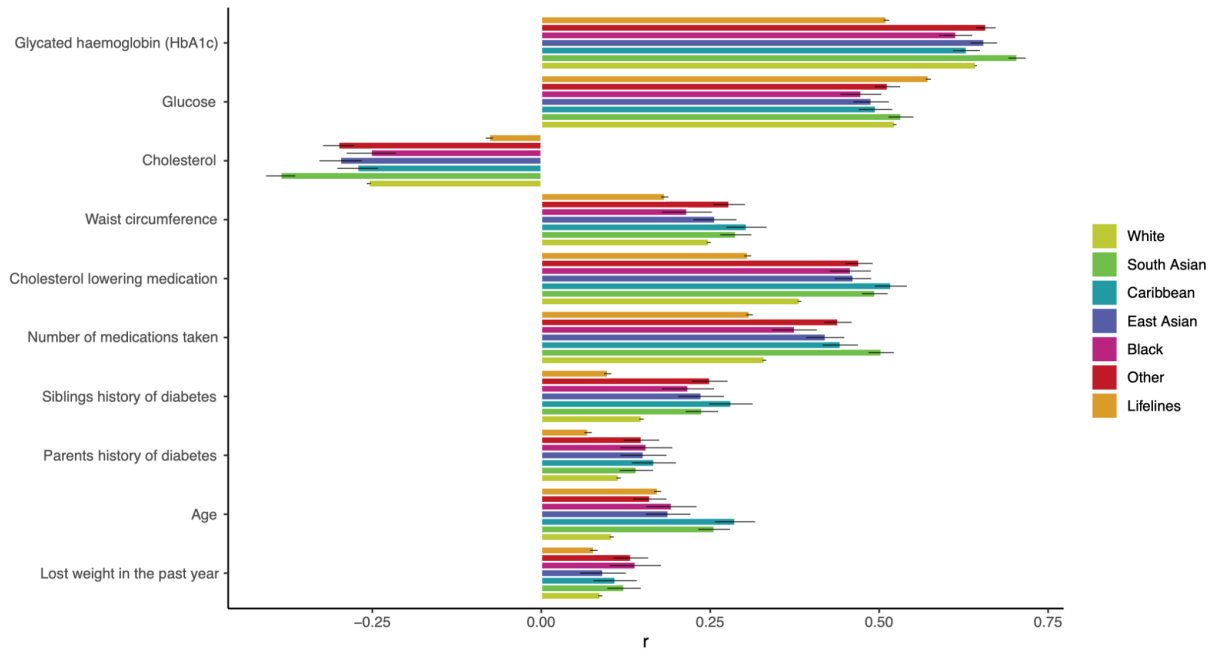

**Supplementary Figure S7A.** AUC scores for the questionnaire, basic measurements, and biomarkers-based prevalence prediction models.

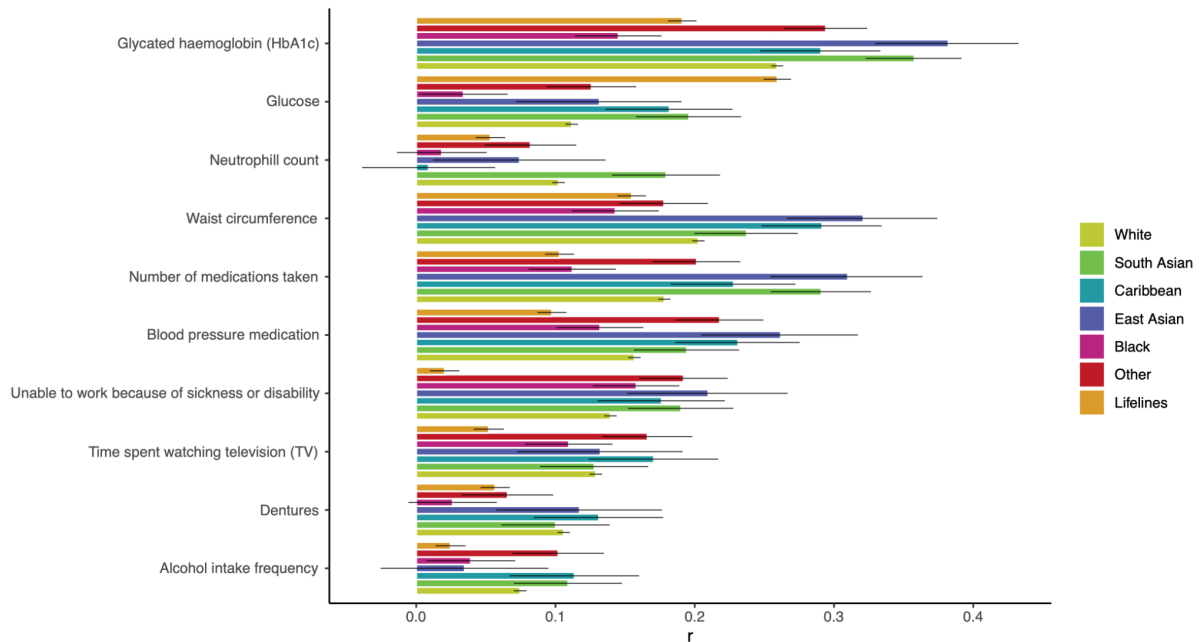

**Supplementary Figure S7B.** AUC scores for the questionnaire, basic measurements, and biomarkers-based incidence prediction models.

*Effective questionnaire-based prediction models for type 2 diabetes across several ethnicities: a model development and validation study*

**Model performance**

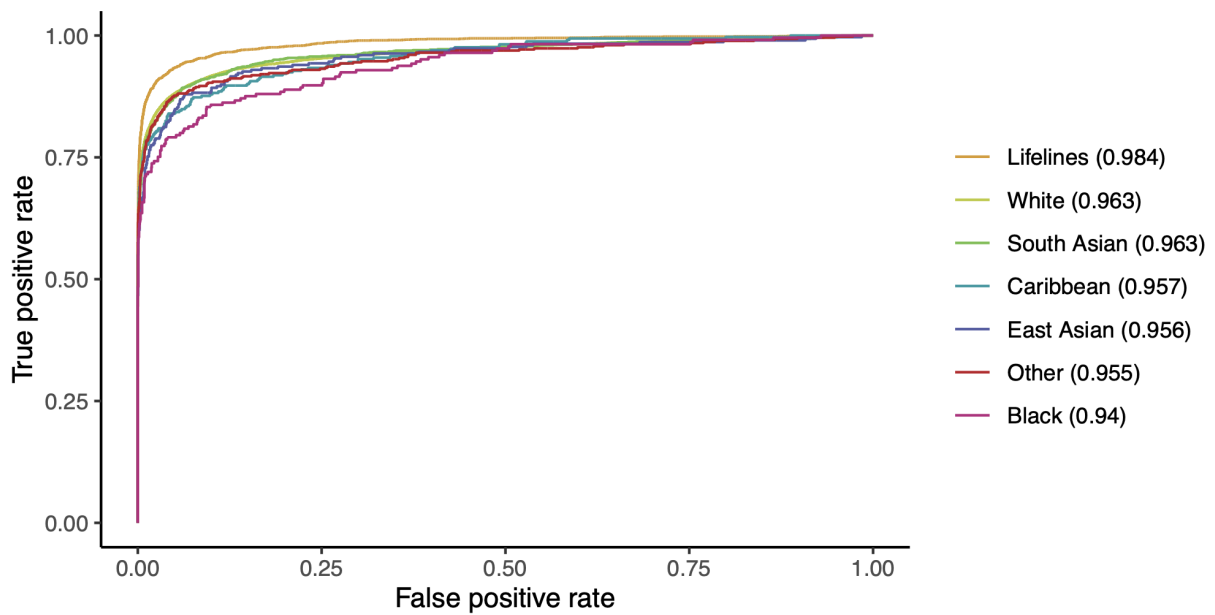

**Supplementary Figure S8A.** AUC scores for the questionnaire, basic measurements & biomarkers-based prevalence prediction models.

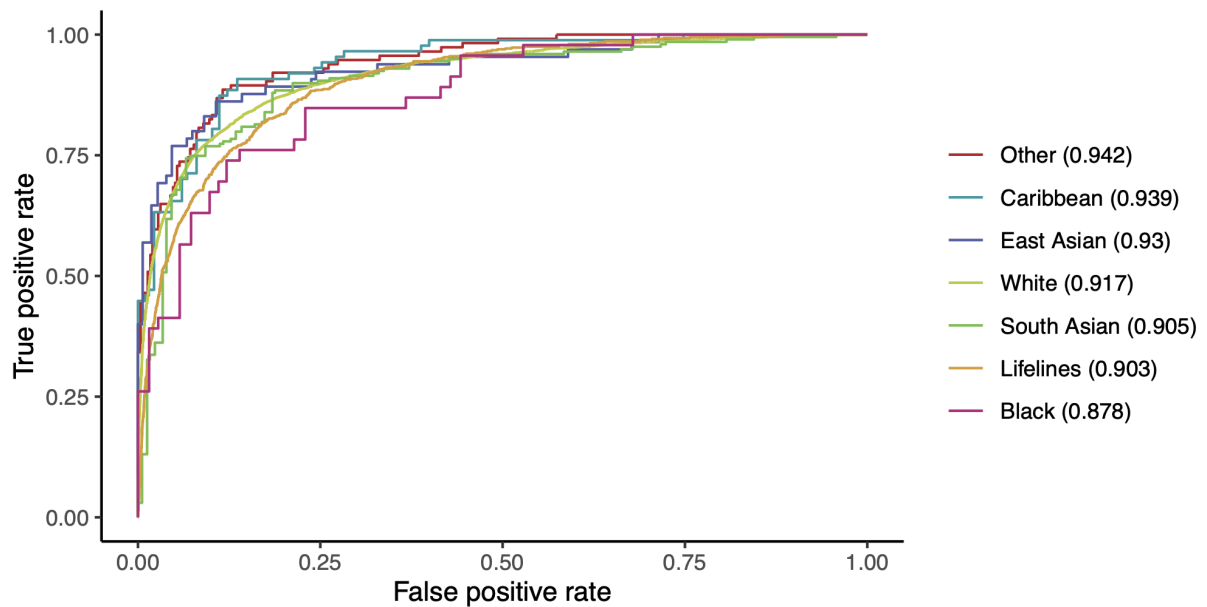

**Supplementary Figure S8B.** AUC scores for the questionnaire, basic measurements & biomarkers-based incidence prediction models.

**Risk stratification**

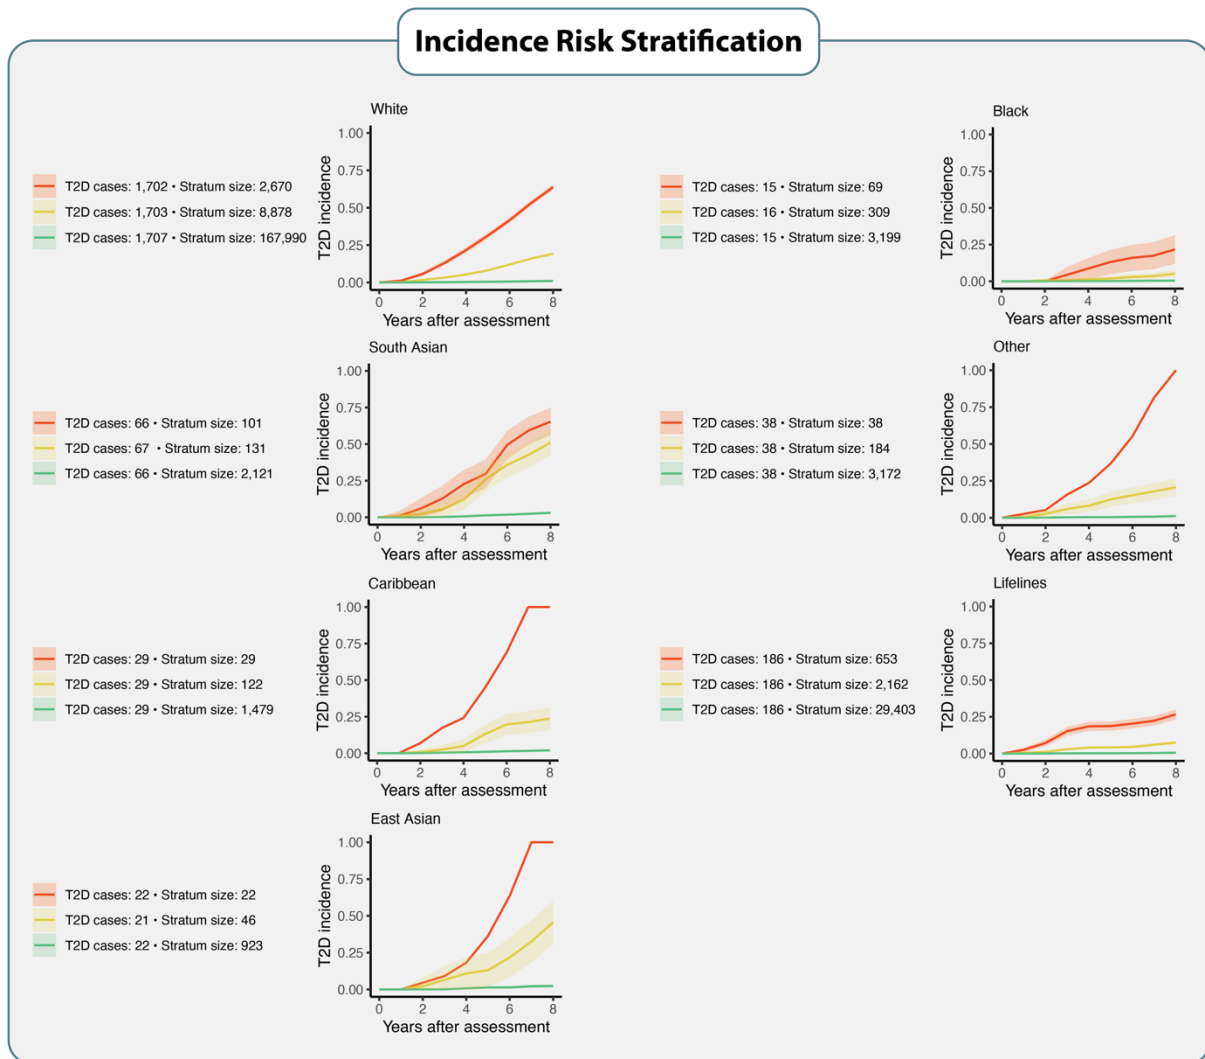

**Supplementary Figures S9.** Risk identification for developing T2D per ethnic group. Every ethnic group is separated into three risk strata, according to the individuals' risk of incident T2D (high risk = red, medium risk = yellow, low risk = green), with each risk stratum containing 33% of all T2D cases. The x-axis represents the interval of years between the biobank entry and the moment of receiving a diagnosis of T2D. The y-axis represents the incidence of T2D. The stronger-coloured lines represent the average T2D incidence within each risk stratum, and the lighter-coloured bands around the lines show the 95% CI. T2D cases correspond to the total number of T2D incident cases within each risk stratum. Stratum size corresponds to the number of individuals within each risk stratum. Stratum sizes show how many individuals must be screened to identify 33% of all T2D cases within each risk-stratum.

### Overall model comparison

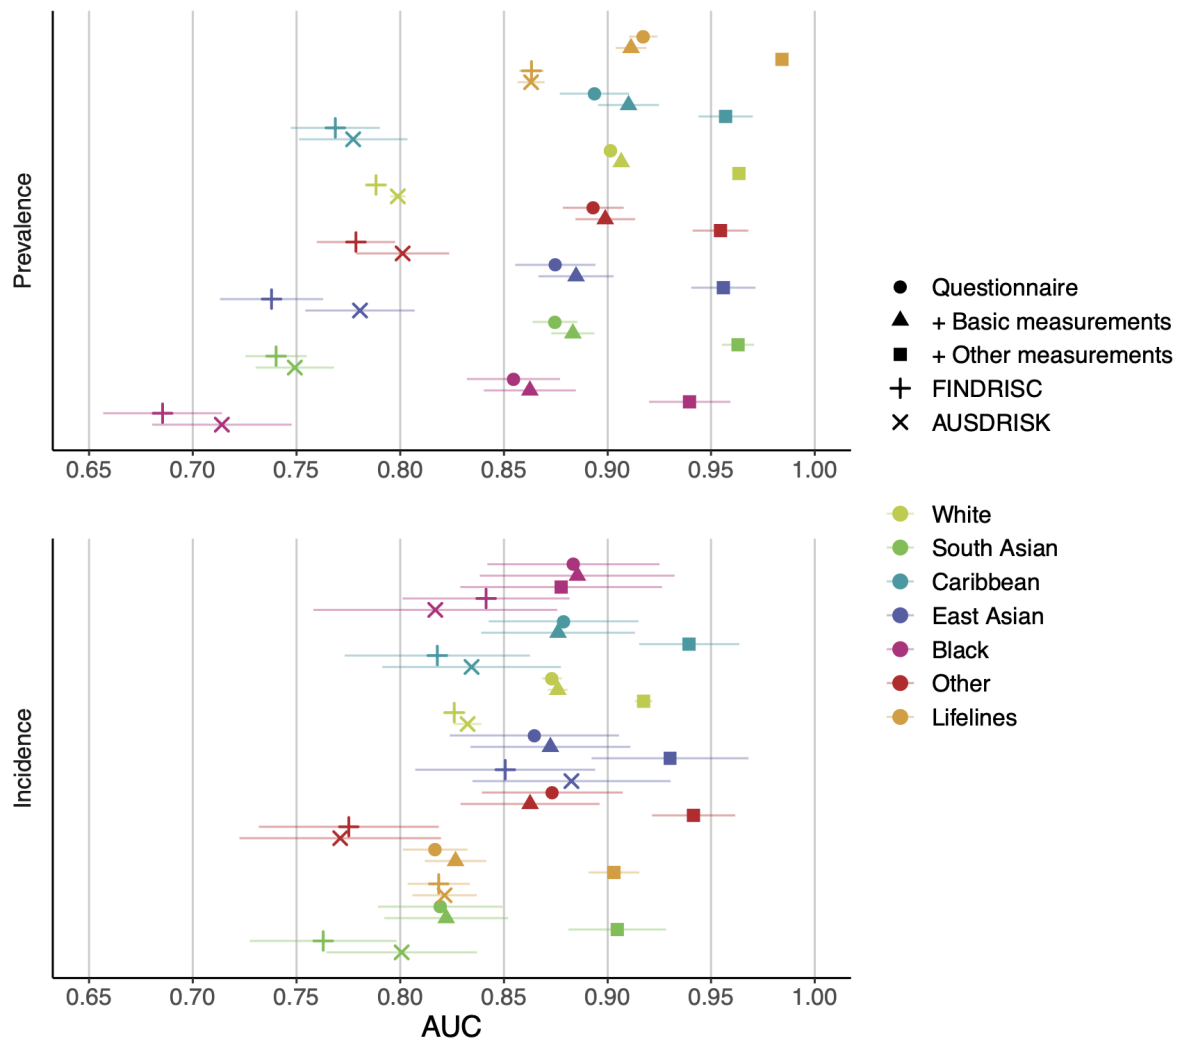

Supplementary Figure S10. All models' performances. Each colour-symbol combination refers to a specific model and population. The AUC and 95% CI are shown for all models.



*Effective questionnaire-based prediction models for type 2 diabetes across several ethnicities: a model  
development and validation study*

**Supplementary Table S8A.** Prevalence prediction comparison between our models.

| <b>Population</b>  | <b>Questionnaire-only VS<br/>Questionnaire &amp; Basic<br/>measurements (P-value)</b> | <b>Questionnaire, Basic<br/>measurements &amp; Biomarkers VS<br/>Questionnaire-only (P-value)</b> | <b>Questionnaire, Basic<br/>measurements &amp; Biomarkers VS<br/>Questionnaire &amp; Basic<br/>measurements (P-value)</b> |
|--------------------|---------------------------------------------------------------------------------------|---------------------------------------------------------------------------------------------------|---------------------------------------------------------------------------------------------------------------------------|
| <b>White</b>       | <0.001                                                                                | <0.001                                                                                            | <0.001                                                                                                                    |
| <b>South Asian</b> | <0.001                                                                                | <0.001                                                                                            | <0.001                                                                                                                    |
| <b>Caribbean</b>   | <0.001                                                                                | <0.001                                                                                            | <0.001                                                                                                                    |
| <b>East Asian</b>  | 0.04                                                                                  | <0.001                                                                                            | <0.001                                                                                                                    |
| <b>Black</b>       | 0.04                                                                                  | <0.001                                                                                            | <0.001                                                                                                                    |
| <b>Other</b>       | 0.06                                                                                  | <0.001                                                                                            | <0.001                                                                                                                    |
| <b>Lifelines</b>   | 0.03                                                                                  | <0.001                                                                                            | <0.001                                                                                                                    |

**Supplementary Table S8B.** Incidence prediction comparison between our models.

| <b>Population</b>  | <b>Questionnaire-only VS<br/>Questionnaire &amp; Basic<br/>measurements (P-value)</b> | <b>Questionnaire, Basic<br/>measurements &amp; Biomarkers VS<br/>Questionnaire-only (P-value)</b> | <b>Questionnaire, Basic<br/>measurements &amp; Biomarkers VS<br/>Questionnaire &amp; Basic<br/>measurements (P-value)</b> |
|--------------------|---------------------------------------------------------------------------------------|---------------------------------------------------------------------------------------------------|---------------------------------------------------------------------------------------------------------------------------|
| <b>White</b>       | 0.01                                                                                  | <0.001                                                                                            | <0.001                                                                                                                    |
| <b>South Asian</b> | 0.8                                                                                   | <0.001                                                                                            | <0.001                                                                                                                    |
| <b>Caribbean</b>   | 0.4                                                                                   | <0.001                                                                                            | <0.001                                                                                                                    |
| <b>East Asian</b>  | 0.1                                                                                   | 0.002                                                                                             | 0.002                                                                                                                     |
| <b>Black</b>       | 0.6                                                                                   | 0.8                                                                                               | 0.8                                                                                                                       |
| <b>Other</b>       | 0.2                                                                                   | <0.001                                                                                            | <0.001                                                                                                                    |
| <b>Lifelines</b>   | <0.001                                                                                | <0.001                                                                                            | <0.001                                                                                                                    |

*Effective questionnaire-based prediction models for type 2 diabetes across several ethnicities: a model  
development and validation study*

**Supplementary Table S9A.** Prevalence prediction comparison between our models and the clinical risk prediction tools AUSDRISK, FINDRISC.

| <b>Population</b>  | <b>Model type</b>                              | <b>Models VS AUSDRISK (P-value)</b> | <b>Models VS FINDRISC (P-value)</b> |
|--------------------|------------------------------------------------|-------------------------------------|-------------------------------------|
| <b>Black</b>       | Questionnaire-only                             | <0.001                              | <0.001                              |
| <b>Other</b>       | Questionnaire-only                             | <0.001                              | <0.001                              |
| <b>East Asian</b>  | Questionnaire-only                             | <0.001                              | <0.001                              |
| <b>Caribbean</b>   | Questionnaire-only                             | <0.001                              | <0.001                              |
| <b>South Asian</b> | Questionnaire-only                             | <0.001                              | <0.001                              |
| <b>White</b>       | Questionnaire-only                             | <0.001                              | <0.001                              |
| <b>Lifelines</b>   | Questionnaire-only                             | <0.001                              | <0.001                              |
| <b>Black</b>       | Questionnaire & basic measurements             | <0.001                              | <0.001                              |
| <b>Other</b>       | Questionnaire & basic measurements             | <0.001                              | <0.001                              |
| <b>East Asian</b>  | Questionnaire & basic measurements             | <0.001                              | <0.001                              |
| <b>Caribbean</b>   | Questionnaire & basic measurements             | <0.001                              | <0.001                              |
| <b>South Asian</b> | Questionnaire & basic measurements             | <0.001                              | <0.001                              |
| <b>White</b>       | Questionnaire & basic measurements             | <0.001                              | <0.001                              |
| <b>Lifelines</b>   | Questionnaire & basic measurements             | <0.001                              | <0.001                              |
| <b>Black</b>       | Questionnaire, basic measurements & biomarkers | <0.001                              | <0.001                              |
| <b>Other</b>       | Questionnaire, basic measurements & biomarkers | <0.001                              | <0.001                              |
| <b>East Asian</b>  | Questionnaire, basic measurements & biomarkers | <0.001                              | <0.001                              |
| <b>Caribbean</b>   | Questionnaire, basic measurements & biomarkers | <0.001                              | <0.001                              |
| <b>South Asian</b> | Questionnaire, basic measurements & biomarkers | <0.001                              | <0.001                              |
| <b>White</b>       | Questionnaire, basic measurements & biomarkers | <0.001                              | <0.001                              |
| <b>Lifelines</b>   | Questionnaire, basic measurements & biomarkers | <0.001                              | <0.001                              |

*Effective questionnaire-based prediction models for type 2 diabetes across several ethnicities: a model  
development and validation study*

**Supplementary Table S9B.** Incidence prediction comparison between our models and the clinical risk prediction tools AUSDRISK, FINDRISC.

| <b>Population</b>  | <b>Model type</b>                              | <b>Models VS AUSDRISK (P-value)</b> | <b>Models VS FINDRISC (P-value)</b> |
|--------------------|------------------------------------------------|-------------------------------------|-------------------------------------|
| <b>Lifelines</b>   | Questionnaire-only                             | 0.4                                 | 0.5                                 |
| <b>South Asian</b> | Questionnaire-only                             | 0.04                                | <0.001                              |
| <b>East Asian</b>  | Questionnaire-only                             | 0.4                                 | 0.4                                 |
| <b>White</b>       | Questionnaire-only                             | <0.001                              | <0.001                              |
| <b>Other</b>       | Questionnaire-only                             | <0.001                              | <0.001                              |
| <b>Caribbean</b>   | Questionnaire-only                             | 0.1                                 | <0.001                              |
| <b>Black</b>       | Questionnaire-only                             | 0.2                                 | 0.2                                 |
| <b>Lifelines</b>   | Questionnaire & basic measurements             | 0.7                                 | 0.01                                |
| <b>South Asian</b> | Questionnaire & basic measurements             | 0.06                                | <0.001                              |
| <b>East Asian</b>  | Questionnaire & basic measurements             | 0.6                                 | 0.08                                |
| <b>White</b>       | Questionnaire & basic measurements             | <0.001                              | <0.001                              |
| <b>Other</b>       | Questionnaire & basic measurements             | <0.001                              | <0.001                              |
| <b>Caribbean</b>   | Questionnaire & basic measurements             | 0.5                                 | 0.006                               |
| <b>Black</b>       | Questionnaire & basic measurements             | 0.05                                | 0.1                                 |
| <b>Lifelines</b>   | Questionnaire, basic measurements & biomarkers | <0.001                              | <0.001                              |
| <b>South Asian</b> | Questionnaire, basic measurements & biomarkers | <0.001                              | <0.001                              |
| <b>East Asian</b>  | Questionnaire, basic measurements & biomarkers | 0.1                                 | <0.001                              |
| <b>White</b>       | Questionnaire, basic measurements & biomarkers | <0.001                              | <0.001                              |
| <b>Other</b>       | Questionnaire, basic measurements & biomarkers | <0.001                              | <0.001                              |
| <b>Caribbean</b>   | Questionnaire, basic measurements & biomarkers | <0.001                              | <0.001                              |
| <b>Black</b>       | Questionnaire, basic measurements & biomarkers | 0.1                                 | 0.2                                 |

## **Reclassification Analysis**

**Supplementary Table S10A.** Reclassification analysis comparing our questionnaire-based model to FINDRISC and AUSDRISK. Reclassification events % correspond to our models' net percentage of reclassified individuals with T2D compared to the clinically established tools. Reclassification of events per 10,000 events corresponds to the net number of T2D cases reclassified when screening 10,000 cases. Positive reclassification events indicate that our models correctly reclassify more cases than the other two clinical tools, whereas negative events indicate the opposite. Reclassification percentages (%) are represented along with the 95% CI.

| <b>Risk model</b> | <b>Ethnicity</b> | <b>N high/low risk</b> | <b>Net<br/>Reclassification<br/>Improvement<br/>(NRI)</b> | <b>NRI p-<br/>value</b> | <b>Reclassification<br/>events %</b> | <b>Reclassification<br/>events p-value</b> | <b>Reclassification<br/>non-events %</b> | <b>Reclassification<br/>non-events p-<br/>value</b> |
|-------------------|------------------|------------------------|-----------------------------------------------------------|-------------------------|--------------------------------------|--------------------------------------------|------------------------------------------|-----------------------------------------------------|
| <b>FINDRISC</b>   | White            | 39,183/139,959         | 0.066 (0.054 - 0.078)                                     | <0.001                  | 6.4 (5.2 - 7.6)                      | <0.001                                     | 0.2 (0 - 0.4)                            | 0.04                                                |
| <b>FINDRISC</b>   | Black            | 1,146/2,288            | 0.022 (-0.052 - 0.097)                                    | 0.6                     | 2.2 (-5.2 - 9.5)                     | 0.6                                        | 0 (-1.2 - 1.2)                           | 1                                                   |
| <b>FINDRISC</b>   | Caribbean        | 300/1,259              | 0.134 (0.043 - 0.225)                                     | 0.004                   | 12.6 (3.7 - 21.5)                    | 0.005                                      | 0.7 (-1.1 - 2.6)                         | 0.4                                                 |
| <b>FINDRISC</b>   | East Asian       | 246/756                | 0.105 (-0.025 - 0.234)                                    | 0.1                     | 9.8 (-2.8 - 22.4)                    | 0.1                                        | 0.6 (-2.3 - 3.6)                         | 0.7                                                 |
| <b>FINDRISC</b>   | Other            | 728/2,625              | 0.153 (0.068 - 0.238)                                     | <0.001                  | 14.8 (6.4 - 23.3)                    | <0.001                                     | 0.5 (-0.8 - 1.8)                         | 0.4                                                 |
| <b>FINDRISC</b>   | South Asian      | 840/1,553              | 0.138 (0.07 - 0.207)                                      | <0.001                  | 12.7 (6.1 - 19.3)                    | <0.001                                     | 1.1 (-0.7 - 3)                           | 0.2                                                 |
| <b>FINDRISC</b>   | Lifelines        | 8,947/23,739           | -0.028 (-0.064 - 0.007)                                   | 0.1                     | -2.8 (-6.3 - 0.7)                    | 0.1                                        | 0 (-0.5 - 0.4)                           | 0.8                                                 |
| <b>AUSDRISK</b>   | White            | 32,084/119,328         | 0.061 (0.045 - 0.076)                                     | <0.001                  | 5.9 (4.4 - 7.4)                      | <0.001                                     | 0.1 (-0.1 - 0.3)                         | 0.2                                                 |
| <b>AUSDRISK</b>   | Black            | 1,129/1,788            | 0.035 (-0.083 - 0.153)                                    | 0.6                     | 3.4 (-8.2 - 15.1)                    | 0.6                                        | 0 (-1.8 - 1.9)                           | 1                                                   |
| <b>AUSDRISK</b>   | Caribbean        | 191/1,066              | 0.061 (-0.037 - 0.158)                                    | 0.2                     | 5.7 (-3.9 - 15.3)                    | 0.2                                        | 0.3 (-1.5 - 2.2)                         | 0.7                                                 |
| <b>AUSDRISK</b>   | East Asian       | 236/527                | 0 (-0.169 - 0.169)                                        | 1                       | 0 (-16.6 - 16.6)                     | 1                                          | 0 (-3.2 - 3.2)                           | 1                                                   |
| <b>AUSDRISK</b>   | Other            | 600/2,235              | 0.264 (0.153 - 0.374)                                     | <0.001                  | 25.6 (14.7 - 36.6)                   | <0.001                                     | 0.7 (-0.8 - 2.2)                         | 0.3                                                 |
| <b>AUSDRISK</b>   | South Asian      | 585/1,418              | 0.082 (-0.006 - 0.171)                                    | 0.07                    | 7.8 (-0.9 - 16.4)                    | 0.08                                       | 0.5 (-1.5 - 2.4)                         | 0.6                                                 |
| <b>AUSDRISK</b>   | Lifelines        | 7,450/23,206           | 0.004 (-0.037 - 0.044)                                    | 0.9                     | 0.4 (-3.7 - 4.4)                     | 0.9                                        | 0 (-0.4 - 0.5)                           | 1                                                   |

*development and validation study*

**Supplementary Table S10B.** Reclassification analysis comparing our Questionnaire & Basic measurements models to FINDRISC and AUSDRISK. Reclassification events % correspond to our models' net percentage of reclassified individuals with T2D compared to the clinically established tools. Reclassification of events per 10,000 events corresponds to the net number of T2D cases reclassified when screening 10,000 cases. Positive reclassification events indicate that our models correctly reclassify more cases than the other two clinical tools, whereas negative events indicate the opposite. Reclassification percentages (%) are represented along with the 95% CI.

| <b>Risk model</b> | <b>Ethnicity</b> | <b>N high/low risk</b> | <b>NRI</b>              | <b>NRI p-value</b> | <b>Reclassification events %</b> | <b>Reclassification events p-value</b> | <b>Reclassification non-events %</b> | <b>Reclassification non-events p-value</b> |
|-------------------|------------------|------------------------|-------------------------|--------------------|----------------------------------|----------------------------------------|--------------------------------------|--------------------------------------------|
| <b>FINDRISC</b>   | White            | 37,718/145,351         | 0·108 (0·096 - 0·12)    | <0·001             | 10·5 (9·3 - 11·6)                | <0·001                                 | 0·3 (0·1 - 0·5)                      | <0·001                                     |
| <b>FINDRISC</b>   | Black            | 1,017/2,586            | 0 (-0·103 - 0·103)      | 1                  | 0 (-10·2 - 10·2)                 | 1                                      | 0 (-1·3 - 1·3)                       | 1                                          |
| <b>FINDRISC</b>   | Caribbean        | 488/1,182              | 0·129 (0·035 - 0·223)   | 0·007              | 12·2 (3·1 - 21·4)                | 0·009                                  | 0·7 (-1·4 - 2·8)                     | 0·5                                        |
| <b>FINDRISC</b>   | East Asian       | 281/752                | 0·115 (0·006 - 0·224)   | 0·04               | 10·8 (0·2 - 21·3)                | 0·05                                   | 0·7 (-1·9 - 3·4)                     | 0·6                                        |
| <b>FINDRISC</b>   | Other            | 925/2,513              | 0·144 (0·063 - 0·225)   | <0·001             | 13·9 (6 - 21·9)                  | <0·001                                 | 0·5 (-0·9 - 1·8)                     | 0·5                                        |
| <b>FINDRISC</b>   | South Asian      | 851/1,562              | 0·076 (0·016 - 0·137)   | 0·01               | 7 (1·2 - 12·8)                   | 0·02                                   | 0·6 (-1·1 - 2·4)                     | 0·5                                        |
| <b>FINDRISC</b>   | Lifelines        | 11,772/20,914          | 0·041 (0·013 - 0·069)   | 0·004              | 4 (1·2 - 6·8)                    | 0·005                                  | 0·1 (-0·3 - 0·5)                     | 0·7                                        |
| <b>AUSDRISK</b>   | White            | 33,641/117,771         | 0·063 (0·049 - 0·078)   | <0·001             | 6·2 (4·7 - 7·6)                  | <0·001                                 | 0·1 (0 - 0·3)                        | 0·1                                        |
| <b>AUSDRISK</b>   | Black            | 797/2,120              | 0·174 (0·036 - 0·313)   | 0·01               | 17·2 (3·5 - 31)                  | 0·01                                   | 0·2 (-1·4 - 1·8)                     | 0·8                                        |
| <b>AUSDRISK</b>   | Caribbean        | 371/886                | 0·091 (0·001 - 0·18)    | 0·05               | 8·6 (-0·1 - 17·2)                | 0·05                                   | 0·5 (-1·8 - 2·9)                     | 0·7                                        |
| <b>AUSDRISK</b>   | East Asian       | 275/488                | 0·103 (-0·015 - 0·221)  | 0·09               | 9·8 (-1·6 - 21·1)                | 0·09                                   | 0·6 (-2·7 - 3·8)                     | 0·7                                        |
| <b>AUSDRISK</b>   | Other            | 702/2,133              | 0·25 (0·142 - 0·359)    | <0·001             | 24·4 (13·6 - 35·1)               | <0·001                                 | 0·7 (-0·9 - 2·3)                     | 0·4                                        |
| <b>AUSDRISK</b>   | South Asian      | 611/1,392              | 0·064 (-0·022 - 0·15)   | 0·1                | 6 (-2·3 - 14·4)                  | 0·2                                    | 0·4 (-1·5 - 2·3)                     | 0·7                                        |
| <b>AUSDRISK</b>   | Lifelines        | 11,032/19,624          | -0·019 (-0·049 - 0·011) | 0·2                | -1·9 (-4·9 - 1·1)                | 0·2                                    | 0 (-0·5 - 0·4)                       | 0·9                                        |

*development and validation study*

**Supplementary Table S10C.** Reclassification analysis comparing our Questionnaire, Basic measurements, and Biomarkers models to FINDRISC and AUSDRISK. Reclassification events % correspond to our models' net percentage of reclassified individuals with T2D compared to the clinically established tools. Reclassification of events per 10,000 events corresponds to the net number of T2D cases reclassified when screening 10,000 cases. Positive reclassification events indicate that our models correctly reclassify more cases than the other two clinical tools, whereas negative events indicate the opposite. Reclassification percentages (%) are represented along with the 95% CI.

| Risk model | Ethnicity   | N high/low risk | NRI                    | NRI p-value | Reclassification events % | Reclassification events p-value | Reclassification non-events % | Reclassification non-events p-value |
|------------|-------------|-----------------|------------------------|-------------|---------------------------|---------------------------------|-------------------------------|-------------------------------------|
| FINDRISC   | White       | 29,517/149,308  | 0.235 (0.22 - 0.249)   | <0.001      | 22.8 (21.4 - 24.2)        | <0.001                          | 0.7 (0.5 - 0.9)               | <0.001                              |
| FINDRISC   | Black       | 485/3,050       | 0.225 (0.075 - 0.375)  | 0.003       | 22.2 (7.3 - 37.2)         | 0.004                           | 0.3 (-0.9 - 1.4)              | 0.6                                 |
| FINDRISC   | Caribbean   | 289/1,341       | 0.279 (0.175 - 0.384)  | <0.001      | 26.4 (16.1 - 36.7)        | <0.001                          | 1.5 (-0.4 - 3.3)              | 0.1                                 |
| FINDRISC   | East Asian  | 154/819         | 0.284 (0.15 - 0.418)   | <0.001      | 26.6 (13.4 - 39.7)        | <0.001                          | 1.9 (-0.7 - 4.4)              | 0.1                                 |
| FINDRISC   | Other       | 482/2,902       | 0.372 (0.277 - 0.468)  | <0.001      | 36 (26.5 - 45.4)          | <0.001                          | 1.3 (-0.1 - 2.6)              | 0.07                                |
| FINDRISC   | South Asian | 569/1,738       | 0.334 (0.257 - 0.41)   | <0.001      | 30.6 (23.2 - 38)          | <0.001                          | 2.8 (0.8 - 4.8)               | 0.007                               |
| FINDRISC   | Lifelines   | 5,830/26,388    | 0.16 (0.117 - 0.204)   | <0.001      | 15.8 (11.4 - 20.1)        | <0.001                          | 0.3 (-0.2 - 0.7)              | 0.2                                 |
| AUSDRISK   | White       | 22,427/125,440  | 0.209 (0.191 - 0.226)  | <0.001      | 20.4 (18.6 - 22.2)        | <0.001                          | 0.5 (0.3 - 0.7)               | <0.001                              |
| AUSDRISK   | Black       | 739/2,112       | 0.105 (-0.043 - 0.252) | 0.2         | 10.3 (-4.3 - 25)          | 0.2                             | 0.1 (-1.5 - 1.7)              | 0.9                                 |
| AUSDRISK   | Caribbean   | 240/999         | 0.268 (0.161 - 0.375)  | <0.001      | 25.4 (15 - 35.8)          | <0.001                          | 1.5 (-0.9 - 3.8)              | 0.2                                 |
| AUSDRISK   | East Asian  | 127/612         | 0.129 (-0.027 - 0.285) | 0.1         | 12.2 (-3.2 - 27.6)        | 0.1                             | 0.7 (-1.9 - 3.3)              | 0.6                                 |
| AUSDRISK   | Other       | 338/2,452       | 0.494 (0.382 - 0.607)  | <0.001      | 48.1 (36.9 - 59.2)        | <0.001                          | 1.4 (-0.2 - 2.9)              | 0.08                                |
| AUSDRISK   | South Asian | 335/1,579       | 0.357 (0.253 - 0.462)  | <0.001      | 33.6 (23.3 - 43.9)        | <0.001                          | 2.1 (0.1 - 4.1)               | 0.04                                |
| AUSDRISK   | Lifelines   | 7,460/22,768    | 0.16 (0.118 - 0.201)   | <0.001      | 15.7 (11.6 - 19.8)        | <0.001                          | 0.3 (-0.2 - 0.8)              | 0.3                                 |
